# Supplementary material for: A High-Protein Diet Reduces Weight Gain, Decreases Food Intake, Decreases Liver Fat Deposition, and Improves Markers of Muscle Metabolism in Obese Zucker Rats
Source: MDPI journal article supplement (doi:10.3390/nu9060587), 2017-06-08
Supplement: s1 [file s1]

## Online Supplementary Material

**Supplemental Table S1. Experimental Diet Composition<sup>1</sup>**

| Ingredient (g/kg)          | 20% Protein <sup>2</sup> | 40% Protein <sup>3</sup> |
|----------------------------|--------------------------|--------------------------|
| Casein                     | 230                      | 460                      |
| DL-Methionine              | 3                        | -                        |
| Sucrose                    | 431.7                    | 231.82                   |
| Corn Starch                | 200                      | 200                      |
| Corn Oil                   | 52.3                     | 50                       |
| Cellulose                  | 37.86                    | 15                       |
| Vitamin Mix                | 10                       | 10                       |
| Ethoxyquin, antioxidant    | 0.01                     | 0.01                     |
| Mineral Mix                | 13.37                    | 13.37                    |
| Calcium Phosphate, dibasic | 16.66                    | 9.6                      |
| Calcium Carbonate          | 5.1                      | 10.2                     |
| kcal/g                     | 3.8                      | 3.8                      |

<sup>1</sup>Experimental diets purchased pre-pelleted and pre-formulated.

<sup>2</sup>Teklad Diets (TD.91352), Envigo RMS, Indianapolis, IN

<sup>3</sup>Teklad Diets (TD.90018), Envigo RMS, Indianapolis, IN.

**Supplemental Table S2. Primer Sequences<sup>1</sup>**

|                          |                                      |
|--------------------------|--------------------------------------|
| rFAS Forward             | 5' - CAGCTGTCAAGTGTAAGAAACATGTC - 3' |
| rFAS Reverse             | 5' - AGCTCACGTGCAGTTTAATTGTG - 3'    |
| rSIRT1 Forward           | 5' - TGGTAGAGCCTCCATAGATCTTCA - 3'   |
| rSIRT1 Reverse           | 5' - TAGGGTCAGAAAGGCTTTGCA - 3'      |
| rPGC-1 $\alpha$ Forward  | 5' - TGAAGAGCGCCGTGTGATT -3'         |
| rPGC-1 $\alpha$ Reverse  | 5' - TTCTGTCCGCGTTGTGTCA -3'         |
| rPPAR $\gamma$ 1 Forward | 5' - CCCACCAACTTCGGAATCAG - 3'       |
| rPPAR $\gamma$ 1 Reverse | 5' - GGAATGGGAGTGGTCATCCA - 3'       |
| r18S Forward             | 5' - TTCGTATTGCGCCGCTAGA - 3'        |
| r18S Reverse             | 5' - CTTTCGCTCTGGTCCGTCTT - 3'       |

<sup>1</sup>National Center for Biotechnology Information (NCBI) Entrez Gene

Supplemental Figure S1

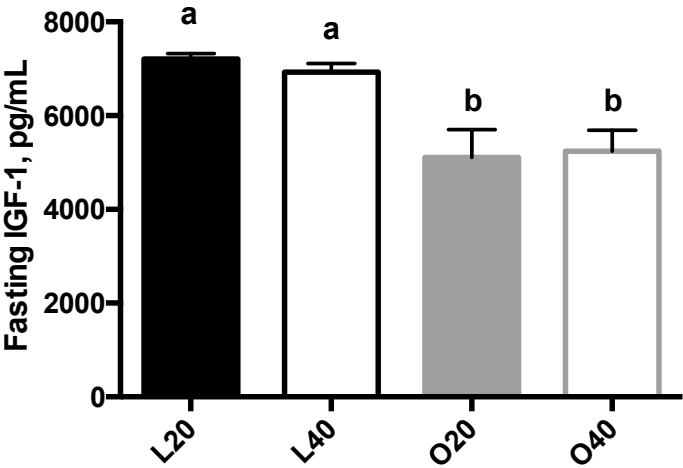

## Supplemental Figure S2

Figure 7 (without boxes around Western blots)

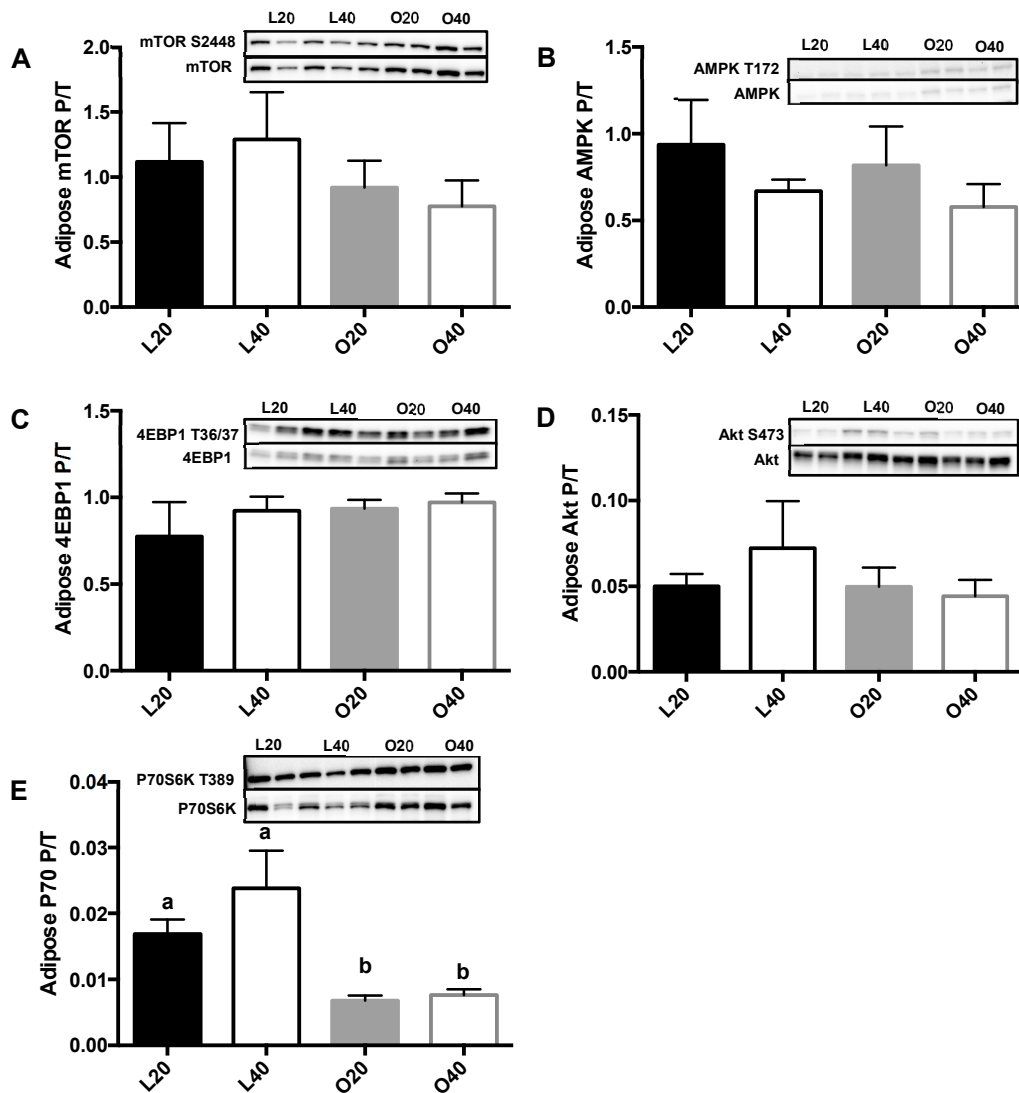

**Figure 7.** Changes in mTORC1 signaling in epididymal adipose tissue following 12-weeks of consuming either a 20% protein (n=8 per group) or 40% protein diet (n=10 per group) in Lean control (L) or Obese Zucker (O) rats. Representative blots are shown, all bands are from the same blot. A. Mammalian target of rapamycin complex 1 (mTORC1) phosphorylation (S2448) over total protein. B. 5' AMP-activated protein kinase (AMPK) phosphorylation (T172) over total protein. C. Eukaryotic translation initiation factor 4E binding protein 1 (4EBP1) phosphorylation (S65) over total protein. D. Protein kinase B (Akt) phosphorylation (S473) over total protein. E. Ribosomal protein S6 kinase 1 (P70) phosphorylation (T389) over total protein. Values are means  $\pm$  SEM. Data was analyzed using one-way ANOVA. Values without a common letter differ,  $P < 0.05$ . Values with an \* were analyzed via t-test and are significantly different within a group (20% versus 40% protein),  $P < 0.05$ . L20, Lean 20% protein; L40, Lean 40% protein; O20, Obese 20% protein; O40, Obese 40% protein; P/T, phosphorylated/total protein. Figure without boxes separating treatment groups can be found in Supplementary Data.
